# Supplementary material for: Conductivity of cold sintered diphasic composites containing a ceramic active material and a solid-state electrolyte or carbon for all solid-state batteries
Source: Royal Society of Chemistry journal article supplement (doi:10.1039/d3ta07067k), 2024-01-01
Supplement: d3ta07067k1.pdf [file d3ta07067k1.pdf]

## Supporting information:

# Conductivity of Cold Sintered Diphasic Composites Containing a Ceramic Active Material and a Solid- State Electrolyte or Carbon for All Solid-State Batteries

Zane M. Grady<sup>1,2</sup>, Zhongming Fan<sup>1,2</sup>, Julian Fanghanel<sup>1,2</sup>, Clive A. Randall<sup>1,2</sup>

<sup>1</sup>Department of Materials Science and Engineering, The Pennsylvania State University, University Park, PA, United States

<sup>2</sup>Materials Research Institute, The Pennsylvania State University, University Park, PA, United States

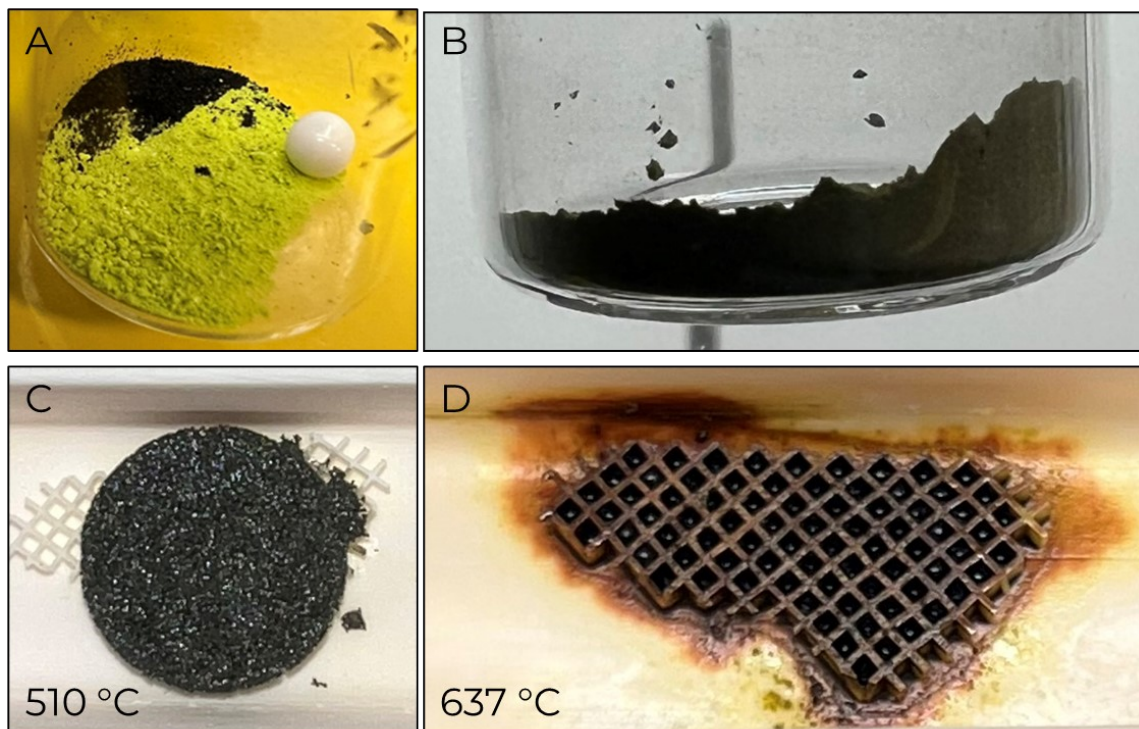

**Figure S1** NVP and carbon prior to mixing (A). NVP and carbon after mixing (B). NVP and carbon pellet after being heated to 510 °C under air (C). NVP and carbon after being heated to 637°C under air (D).

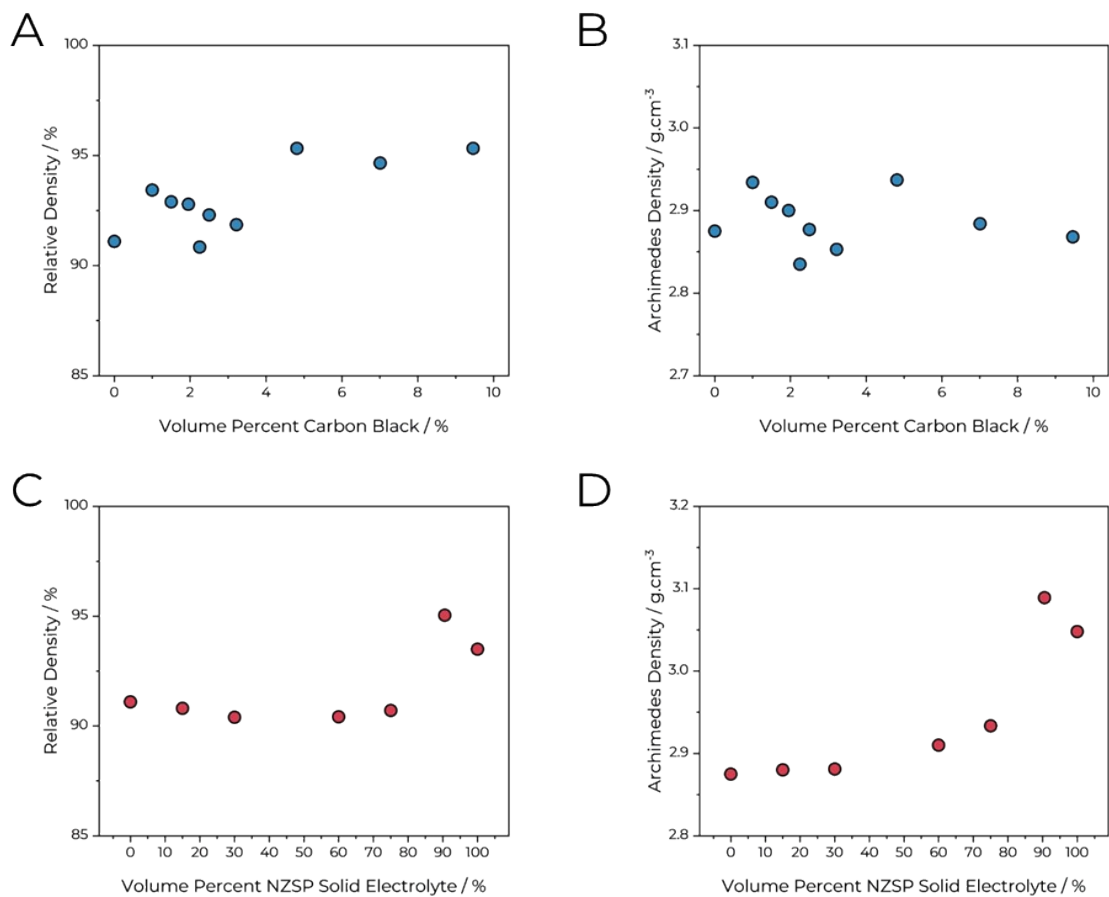

**Figure S2** The relative density (**A**) and Archimedes density (**B**) of carbon black – NVP composites. The relative density (**C**) and Archimedes density (**D**) of NZSP – NVP composites. Theoretical densities calculated based on volume fraction of composite and material densities (NVP = 3.16, NZSP = 3.26, carbon black = 1.6 g cm<sup>-3</sup>)

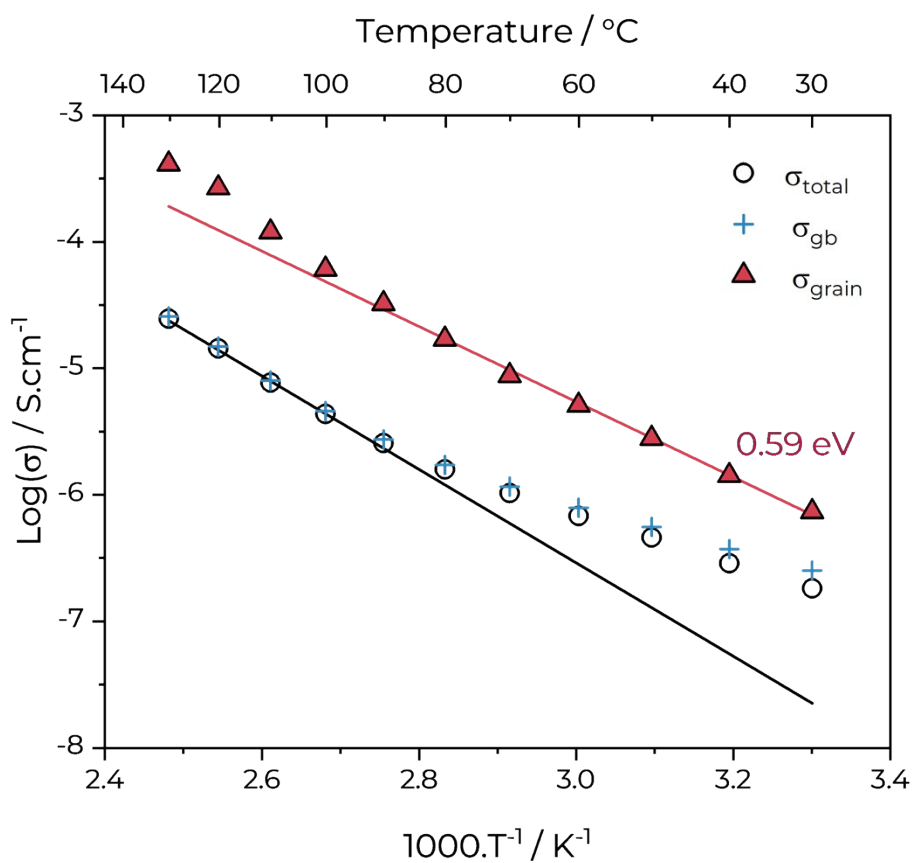

**Figure S3** The logarithm of total, grain boundary (gb), and grain interior (grain) conductivity plotted against inverse absolute temperature for the pure cold sintered NVP.

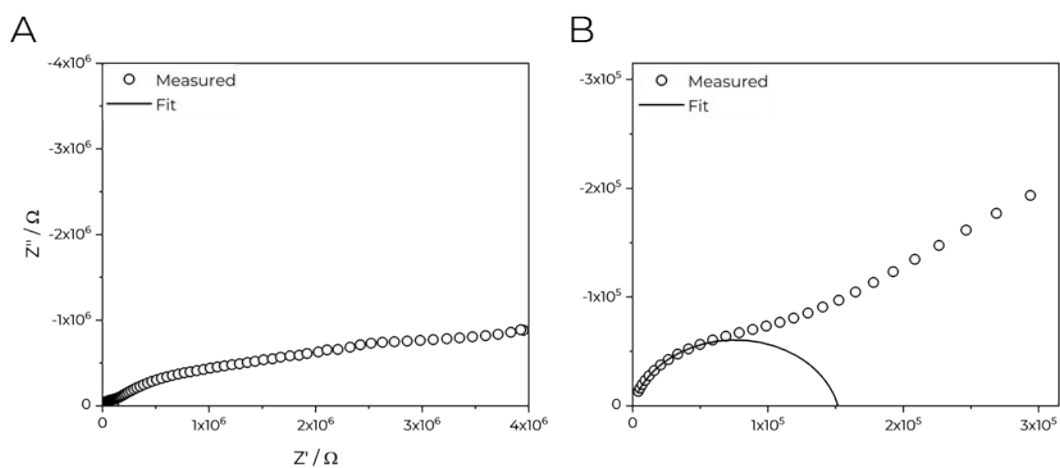

**Figure S4** Complex impedance spectra of a sample containing 2.25 vol.% carbon black. The dispersion in the low frequency data renders it difficult to fit (A), but  $R_{tot}$  can be estimated from the well-resolved high frequency semicircle, as shown in (B)

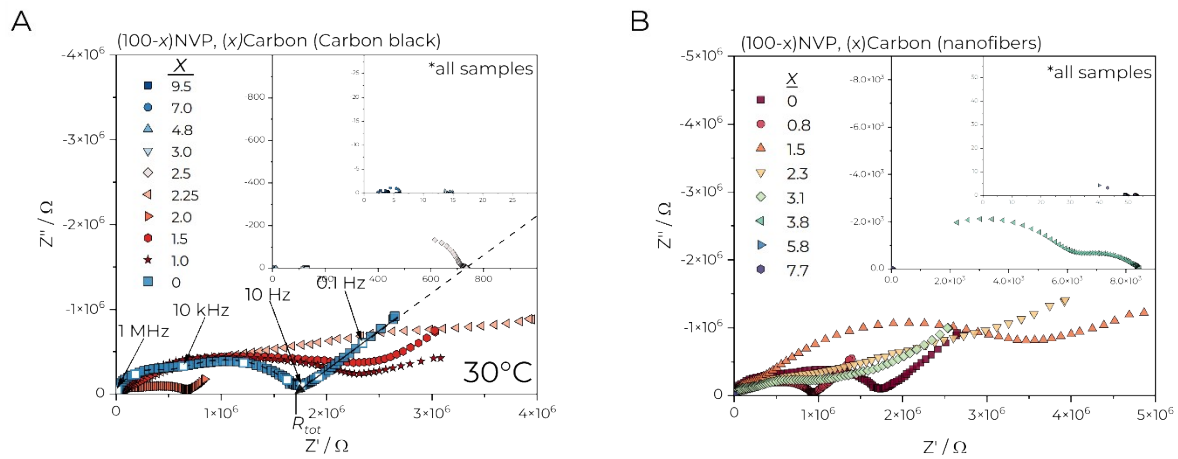

**Figure S5** The EIS spectra of all carbon-NVP composites at 30°C. The data for Super P is shown in A and that for carbon nanofibers is shown in B.

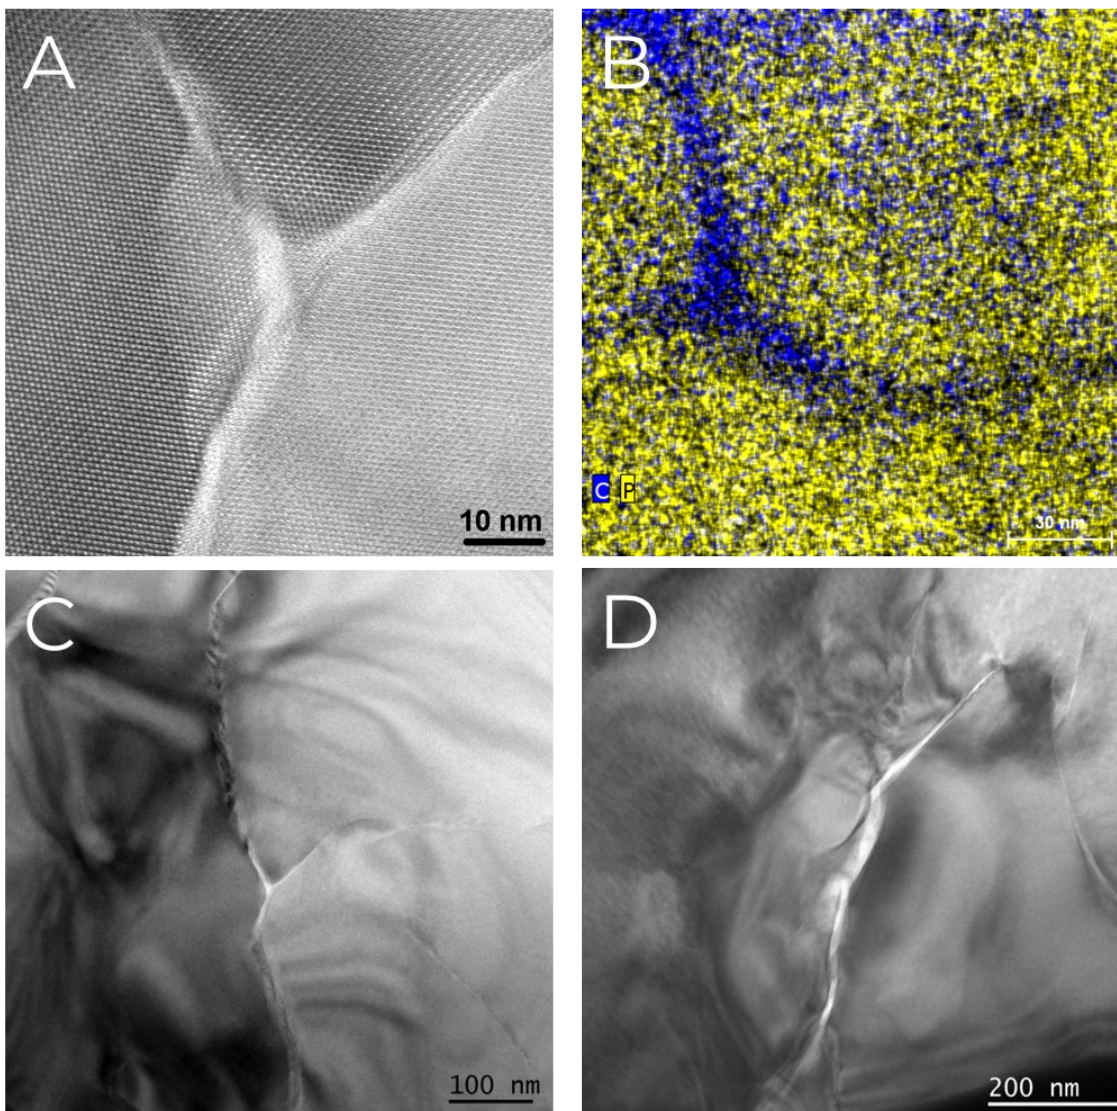

**Figure S6** Additional TEM images demonstrating carbon presence in the grain boundaries of a carbon black – NVP diphase composite.

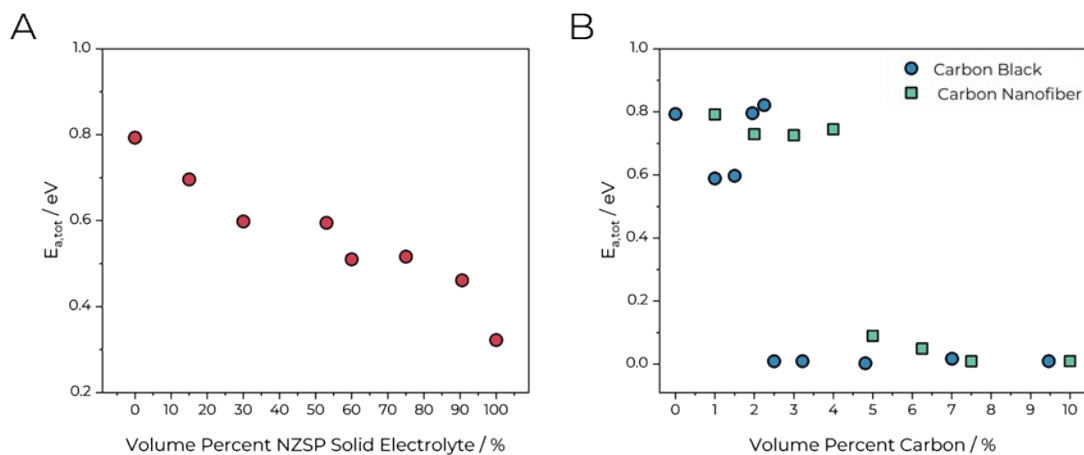

**Figure S7**  $E_{a,tot}$  is plotted as a function of volume fraction of NZSP (A) or carbon (B)

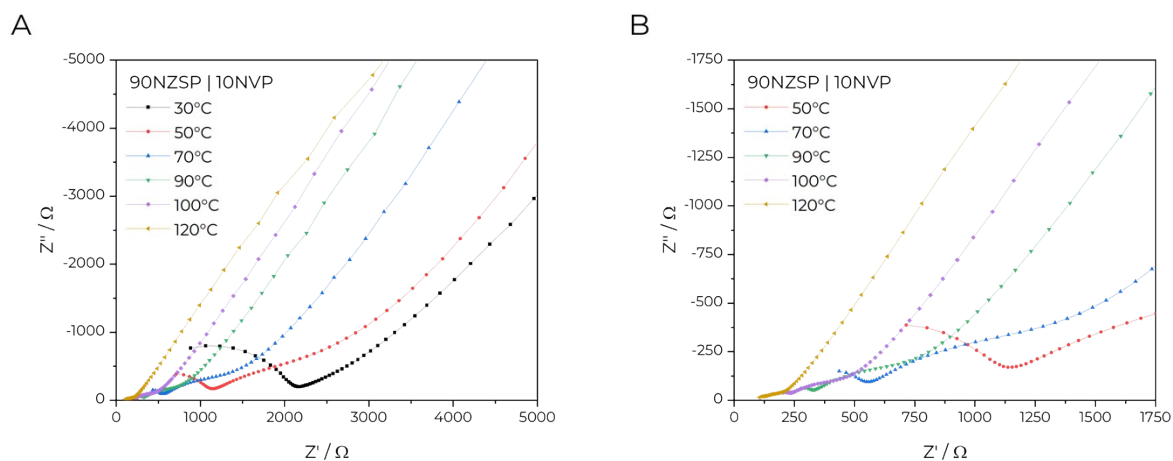

**Figure S8** The EIS spectra of a 90 vol.% NZSP sample used for Mott-Schottky experiments. Multiple temperatures are shown to illustrate the reason for choosing 70°C. The high frequency semicircle is the NZSP response, the intermediate frequency semicircle is the interfacial response. The lines are only meant as a guide to the eye, not an equivalent circuit fitting.
